# Supplementary material
Source: PubMed Central journal article supplement (PMC5920529)

## Supplementary Online Content

Chavez-MacGregor M, Clarke CA, Lichtensztajn DY, Giordano SH. Delayed initiation of adjuvant chemotherapy among patients with breast cancer. *JAMA Oncol*. Published online December 10, 2015. doi:10.1001/jamaoncol.2015.3856.

**eTable 1.** Patient characteristics according to time to adjuvant chemotherapy (TTC) category among breast cancer patients identified in the CCR (2005-2010.)

**eTable 2.** Multivariable cox proportional hazards model for breast cancer specific survival among breast cancer patients diagnosed in California and treated with adjuvant chemotherapy (2005-2010) according to breast cancer subtype\*.

**eFigure.** Kaplan-Meier curves for overall survival according to time to chemotherapy (TTC) category by breast cancer subtype among breast cancer patients identified in the CCR (2005-2010).

This supplementary material has been provided by the authors to give readers additional information about their work.

**Elements included in the supplement:**

**eTable-1: Patient characteristics according to time to adjuvant chemotherapy (TTC) category among breast cancer patients identified in the CCR (2005-2010.)**

**eTable-2. Multivariable cox proportional hazards model for breast cancer specific survival among breast cancer patients diagnosed in California and treated with adjuvant chemotherapy (2005-2010) according to breast cancer subtype\*.**

**eFigure-1: Kaplan-Meier curves for overall survival according to time to chemotherapy (TTC) category by breast cancer subtype among breast cancer patients identified in the CCR (2005-2010).**

**eTable-1. Patient characteristics according to time to adjuvant chemotherapy (TTC) category among breast cancer patients identified in the CCR (2005-2010.)**

|                              |                          | Time to chemo<br>N (Row %) |                                     |                                        |                                       |                             | p<br>value |
|------------------------------|--------------------------|----------------------------|-------------------------------------|----------------------------------------|---------------------------------------|-----------------------------|------------|
|                              |                          | Total<br>N=<br>2484<br>3   | <31<br>days<br>5224<br>(21.03<br>%) | 31-60<br>days<br>12432<br>(50.04<br>%) | 61-90<br>days<br>4765<br>(19.18<br>%) | 91+ days<br>2422<br>(9.75%) |            |
| <b>Age at diagnosis</b>      | <40                      | 2832                       | 747<br>(26.38)                      | 1329<br>(46.93)                        | 475<br>(16.77)                        | 281 ( 9.92)                 | <.00<br>01 |
|                              | 41-59                    | 1464<br>8                  | 3092<br>(21.11)                     | 7402<br>(50.53)                        | 2794<br>(19.07)                       | 1360 ( 9.28)                |            |
|                              | 60-79                    | 7131                       | 1346<br>(18.88)                     | 3581<br>(50.22)                        | 1460<br>(20.47)                       | 744 (10.43)                 |            |
|                              | 80+                      | 232                        | 39<br>(16.81)                       | 120<br>(51.72)                         | 36<br>(15.52)                         | 37 (15.95)                  |            |
| <b>Race/<br/>ethnicity</b>   | NH White                 | 1421<br>1                  | 3233<br>(22.75)                     | 7110<br>(50.03)                        | 2627<br>(18.49)                       | 1241 ( 8.73)                | <.00<br>01 |
|                              | NH Black                 | 1811                       | 288<br>(15.90)                      | 922<br>(50.91)                         | 367<br>(20.27)                        | 234 (12.92)                 |            |
|                              | Hispanic                 | 5228                       | 928<br>(17.75)                      | 2596<br>(49.66)                        | 1096<br>(20.96)                       | 608 (11.63)                 |            |
|                              | Asian / PI               | 3351                       | 713<br>(21.28)                      | 1698<br>(50.67)                        | 628<br>(18.74)                        | 312 ( 9.31)                 |            |
|                              | American<br>Indian/other | 242                        | 62<br>(25.62)                       | 106<br>(43.80)                         | 47<br>(19.42)                         | 27 (11.16)                  |            |
| <b>Year of<br/>diagnosis</b> | 2005                     | 3543                       | 827<br>(23.34)                      | 1721<br>(48.57)                        | 662<br>(18.68)                        | 333 ( 9.40)                 | <.00<br>01 |
|                              | 2006                     | 3935                       | 890<br>(22.62)                      | 1933<br>(49.12)                        | 729<br>(18.53)                        | 383 ( 9.73)                 |            |
|                              | 2007                     | 4364                       | 934<br>(21.40)                      | 2125<br>(48.69)                        | 846<br>(19.39)                        | 459 (10.52)                 |            |
|                              | 2008                     | 4419                       | 911<br>(20.62)                      | 2261<br>(51.17)                        | 865<br>(19.57)                        | 382 ( 8.64)                 |            |
|                              | 2009                     | 4331                       | 848                                 | 2169                                   | 884                                   | 430 ( 9.93)                 |            |

|                         |                    |           |                 |                 |                 |              |        |
|-------------------------|--------------------|-----------|-----------------|-----------------|-----------------|--------------|--------|
|                         |                    |           | (19.58)         | (50.08)         | (20.41)         |              |        |
|                         | 2010               | 4251      | 814<br>(19.15)  | 2223<br>(52.29) | 779<br>(18.33)  | 435 (10.23)  |        |
| <b>Neighborhood SES</b> | 1 (lowest)         | 3051      | 482<br>(15.80)  | 1470<br>(48.18) | 695<br>(22.78)  | 404 (13.24)  | <.0001 |
|                         | 2                  | 4252      | 771<br>(18.13)  | 2132<br>(50.14) | 889<br>(20.91)  | 460 (10.82)  |        |
|                         | 3                  | 5158      | 1012<br>(19.62) | 2627<br>(50.93) | 1002<br>(19.43) | 517 (10.02)  |        |
|                         | 4                  | 5813      | 1234<br>(21.23) | 2984<br>(51.33) | 1056<br>(18.17) | 539 ( 9.27)  |        |
|                         | 5 (highest)        | 6569      | 1725<br>(26.26) | 3219<br>(49.00) | 1123<br>(17.10) | 502 ( 7.64)  |        |
| <b>Grade</b>            | Grade I            | 2642      | 459<br>(17.37)  | 1302<br>(49.28) | 569<br>(21.54)  | 312 (11.81)  | <.0001 |
|                         | Grade II           | 9678      | 1901<br>(19.64) | 4847<br>(50.08) | 1969<br>(20.35) | 961 ( 9.93)  |        |
|                         | Grade III/<br>high | 1204<br>6 | 2763<br>(22.94) | 6059<br>(50.30) | 2135<br>(17.72) | 1089 ( 9.04) |        |
|                         | Unknown            | 477       | 101<br>(21.17)  | 224<br>(46.96)  | 92<br>(19.29)   | 60 (12.58)   |        |
| <b>AJCC stage</b>       | I                  | 6816      | 1305<br>(19.15) | 3362<br>(49.33) | 1369<br>(20.09) | 780 (11.44)  | <.0001 |
|                         | II                 | 1302<br>0 | 2680<br>(20.58) | 6646<br>(51.04) | 2504<br>(19.23) | 1190 ( 9.14) |        |
|                         | III                | 5007      | 1239<br>(24.75) | 2424<br>(48.41) | 892<br>(17.82)  | 452 ( 9.03)  |        |
| <b>Tumor subtype</b>    | HR+                | 1386<br>9 | 2718<br>(19.60) | 6955<br>(50.15) | 2839<br>(20.47) | 1357 ( 9.78) | <.0001 |
|                         | Her2 +             | 6276      | 1325<br>(21.11) | 3147<br>(50.14) | 1110<br>(17.69) | 694 (11.06)  |        |
|                         | TNBC               | 4698      | 1181<br>(25.14) | 2330<br>(49.60) | 816<br>(17.37)  | 371 ( 7.90)  |        |

|                               |                           |           |                 |                  |                 |                 |        |
|-------------------------------|---------------------------|-----------|-----------------|------------------|-----------------|-----------------|--------|
| <b>Surgical procedure</b>     | Breast conserving surgery | 1297<br>1 | 2782<br>(21.45) | 6567<br>(50.63)  | 2428<br>(18.72) | 1194 ( 9.21)    | 0.0015 |
|                               | Mastectomy                | 1187<br>2 | 2442<br>(20.57) | 5865<br>(49.40)  | 2337<br>(19.68) | 1228<br>(10.34) |        |
|                               |                           |           |                 |                  |                 |                 |        |
| <b>Radiation</b>              | yes                       | 1329<br>3 | 3133<br>(23.57) | 6667<br>(50.15)  | 2338<br>(17.59) | 1155 ( 8.69)    | <.0001 |
|                               | no                        | 1155<br>0 | 2091<br>(18.10) | 5765<br>(49.91)  | 2427<br>(21.01) | 1267<br>(10.97) |        |
|                               |                           |           |                 |                  |                 |                 |        |
| <b>Reconstructive surgery</b> | yes                       | 2438      | 572<br>(23.46)  | 1155<br>(47.37)  | 422<br>(17.31)  | 289 (11.85)     | <.0001 |
|                               | no                        | 2240<br>5 | 4652<br>(20.76) | 11277<br>(50.33) | 4343<br>(19.38) | 2133 ( 9.52)    |        |
|                               |                           |           |                 |                  |                 |                 |        |
| <b>Histology</b>              | ductal                    | 2194<br>2 | 4676<br>(21.31) | 11018<br>(50.21) | 4132<br>(18.83) | 2116 ( 9.64)    | <.0001 |
|                               | lobular                   | 1879      | 344<br>(18.31)  | 929<br>(49.44)   | 427<br>(22.72)  | 179 ( 9.53)     |        |
|                               | other                     | 1022      | 204<br>(19.96)  | 485<br>(47.46)   | 206<br>(20.16)  | 127 (12.43)     |        |
|                               |                           |           |                 |                  |                 |                 |        |
| <b>NCI Cancer Center</b>      | yes                       | 1661      | 294<br>(17.70)  | 809<br>(48.71)   | 365<br>(21.97)  | 193 (11.62)     | <.0001 |
|                               | no                        | 2318<br>2 | 4930<br>(21.27) | 11623<br>(50.14) | 4400<br>(18.98) | 2229 ( 9.62)    |        |
|                               |                           |           |                 |                  |                 |                 |        |
| <b>Marital status</b>         | Married                   | 1584<br>5 | 3517<br>(22.20) | 7997<br>(50.47)  | 2971<br>(18.75) | 1360 ( 8.58)    | <.0001 |
|                               | Not currently married     | 8475      | 1611<br>(19.01) | 4171<br>(49.22)  | 1680<br>(19.82) | 1013<br>(11.95) |        |
|                               | unknown                   | 523       | 96<br>(18.36)   | 264<br>(50.48)   | 114<br>(21.80)  | 49 ( 9.37)      |        |
|                               |                           |           |                 |                  |                 |                 |        |
| <b>Primary payer at dx</b>    | Private                   | 1777<br>2 | 4017<br>(22.60) | 9184<br>(51.68)  | 3171<br>(17.84) | 1400 ( 7.88)    | <.0001 |
|                               | Medicare                  | 1651      | 315             | 816              | 323             | 197 (11.93)     |        |

|                             |                      |       |                 |                  |                 |             |        |
|-----------------------------|----------------------|-------|-----------------|------------------|-----------------|-------------|--------|
|                             |                      |       | (19.08)         | (49.42)          | (19.56)         |             |        |
|                             | Public/Medic aid     | 4259  | 700<br>(16.44)  | 1864<br>(43.77)  | 980<br>(23.01)  | 715 (16.79) |        |
|                             | Military             | 223   | 42<br>(18.83)   | 100<br>(44.84)   | 58<br>(26.01)   | 23 (10.31)  |        |
|                             | Not insured/self-pay | 208   | 36<br>(17.31)   | 86<br>(41.35)    | 59<br>(28.37)   | 27 (12.98)  |        |
|                             | Unknown              | 730   | 114<br>(15.62)  | 382<br>(52.33)   | 174<br>(23.84)  | 60 ( 8.22)  |        |
|                             |                      |       |                 |                  |                 |             |        |
| <b>Contralateral tumor*</b> | yes                  | 753   | 145<br>(19.26)  | 352<br>(46.75)   | 174<br>(23.11)  | 82 (10.89)  | 0.0175 |
|                             | no                   | 24090 | 5079<br>(21.08) | 12080<br>(50.15) | 4591<br>(19.06) | 234071)     |        |

\*We identified patients with contralateral breast cancer diagnosed within 3 months of the first tumor. Of those, 279 had their second cancer diagnosed between the date of surgery and the first dose of adjuvant chemotherapy.

**eTable-2. Multivariable cox proportional hazards model for breast cancer specific survival among breast cancer patients diagnosed in California and treated with adjuvant chemotherapy (2005-2010) according to breast cancer subtype\*.**

|                                |                       | Hazard of breast cancer specific death<br>HR (95% CI) |                           |                           |
|--------------------------------|-----------------------|-------------------------------------------------------|---------------------------|---------------------------|
|                                |                       | Hormone Receptor Positive                             | HER2+                     | TNBC                      |
| <b>Time to Chemotherapy</b>    | <31 days              | 1.0                                                   | 1.0                       | 1.0                       |
|                                | 31-60 days            | 0.91 (0.74 - 1.13)                                    | 0.95 (0.72 - 1.25)        | 1.08 (0.87 - 1.33)        |
|                                | 61-90 days            | 0.96 (0.74 - 1.24)                                    | 0.94 (0.66 - 1.35)        | 1.10 (0.84 - 1.43)        |
|                                | 91+ days              | 1.23 (0.92 - 1.66)                                    | 1.02 (0.68 - 1.53)        | <b>1.53 (1.13 - 2.07)</b> |
| <b>Age at diagnosis</b>        | 0-40                  | 1.30 (0.98 - 1.71)                                    | 0.99 (0.69 - 1.42)        | 1.12 (0.84 - 1.47)        |
|                                | 41-59                 | <b>0.76 (0.62 - 0.92)</b>                             | 0.79 (0.60 - 1.03)        | 0.89 (0.73 - 1.10)        |
|                                | 60-79                 | 1.0                                                   | 1.0                       | 1.0                       |
|                                | 80+                   | <b>2.21 (1.13 - 4.32)</b>                             | 1.60 (0.77 - 3.34)        | <b>2.42 (1.52 - 3.86)</b> |
| <b>Gender</b>                  | Female                | 1.0                                                   | 1.0                       | 1.0                       |
|                                | Male                  | 1.11 (0.50 - 2.50)                                    | 1.41 (0.45 - 4.44)        | 0.00 (0.00 - ****)        |
| <b>Race/ethnicity</b>          | NH White              | 1.0                                                   | 1.0                       | 1.0                       |
|                                | NH Black              | 1.14 (0.83 - 1.57)                                    | <b>1.58 (1.08 - 2.31)</b> | <b>1.34 (1.05 - 1.71)</b> |
|                                | Hispanic              | <b>0.73 (0.57 - 0.92)</b>                             | 0.81 (0.60 - 1.09)        | 0.97 (0.77 - 1.23)        |
|                                | Asian / PI            | 0.79 (0.60 - 1.05)                                    | 0.82 (0.57 - 1.18)        | 0.77 (0.55 - 1.08)        |
|                                | American Indian/other | 1.09 (0.49 - 2.46)                                    | 0.46 (0.11 - 1.87)        | 1.13 (0.47 - 2.75)        |
| <b>AJCC Stage at diagnosis</b> | I                     | 1.0                                                   | 1.0                       | 1.0                       |
|                                | II                    | <b>2.27 (1.64 - 3.14)</b>                             | <b>3.26 (2.04 - 5.21)</b> | <b>2.51 (1.94 - 3.25)</b> |

|                                        |                       |                           |                           |                           |
|----------------------------------------|-----------------------|---------------------------|---------------------------|---------------------------|
|                                        | III                   | <b>7.17 (5.20 - 9.90)</b> | <b>13.8 (8.77 - 21.8)</b> | <b>7.01 (5.35 - 9.18)</b> |
| <b>Neighborhood SES</b>                | 1 (lowest)            | <b>1.77 (1.30 - 2.42)</b> | <b>1.53 (1.03 - 2.28)</b> | 1.08 (0.80 - 1.45)        |
|                                        | 2                     | <b>1.66 (1.26 - 2.19)</b> | 1.34 (0.92 - 1.94)        | 1.07 (0.82 - 1.40)        |
|                                        | 3                     | <b>1.56 (1.20 - 2.02)</b> | 1.32 (0.93 - 1.88)        | 1.16 (0.90 - 1.50)        |
|                                        | 4                     | <b>1.60 (1.25 - 2.06)</b> | 1.16 (0.81 - 1.66)        | 1.01 (0.78 - 1.31)        |
|                                        | 5 (highest)           | 1.0                       | 1.0                       | 1.0                       |
| <b>Marital status</b>                  | Married               | 1.0                       | 1.0                       | 1.0                       |
|                                        | Not currently married | 1.03 (0.86 - 1.22)        | 0.97 (0.77 - 1.24)        | 0.99 (0.83 - 1.19)        |
|                                        | unknown               | 1.09 (0.59 - 1.99)        | <b>2.31 (1.17 - 4.58)</b> | 1.04 (0.58 - 1.87)        |
| <b>Primary payer/ insurance status</b> | Medicare              | <b>1.64 (1.22 - 2.22)</b> | 0.76 (0.44 - 1.29)        | 1.23 (0.89 - 1.69)        |
|                                        | Military              | 0.45 (0.11 - 1.82)        | 0.71 (0.17 - 2.88)        | 1.10 (0.35 - 3.45)        |
|                                        | Not insured/self-pay  | <b>2.13 (1.05 - 4.33)</b> | 0.96 (0.30 - 3.04)        | 0.88 (0.32 - 2.36)        |
|                                        | Private               | 1.0                       | 1.0                       | 1.0                       |
|                                        | Public/Medicaid       | <b>1.64 (1.32 - 2.03)</b> | <b>1.34 (1.02 - 1.76)</b> | 1.20 (0.96 - 1.50)        |
|                                        | Unknown               | 0.98 (0.59 - 1.66)        | 0.72 (0.39 - 1.33)        | 0.76 (0.46 - 1.25)        |
| <b>NCI-designated Cancer Center</b>    | no                    | 1.0                       | 1.0                       | 1.0                       |
|                                        | yes                   | <b>0.68 (0.46 - 1.00)</b> | 0.77 (0.47 - 1.29)        | 0.78 (0.54 - 1.14)        |

\*Models also adjusted for individual year of diagnosis



**eFigure-1: Kaplan-Meier curves for overall survival according to time to chemotherapy (TTC) category by breast cancer subtype among breast cancer patients identified in the CCR (2005-2010).**

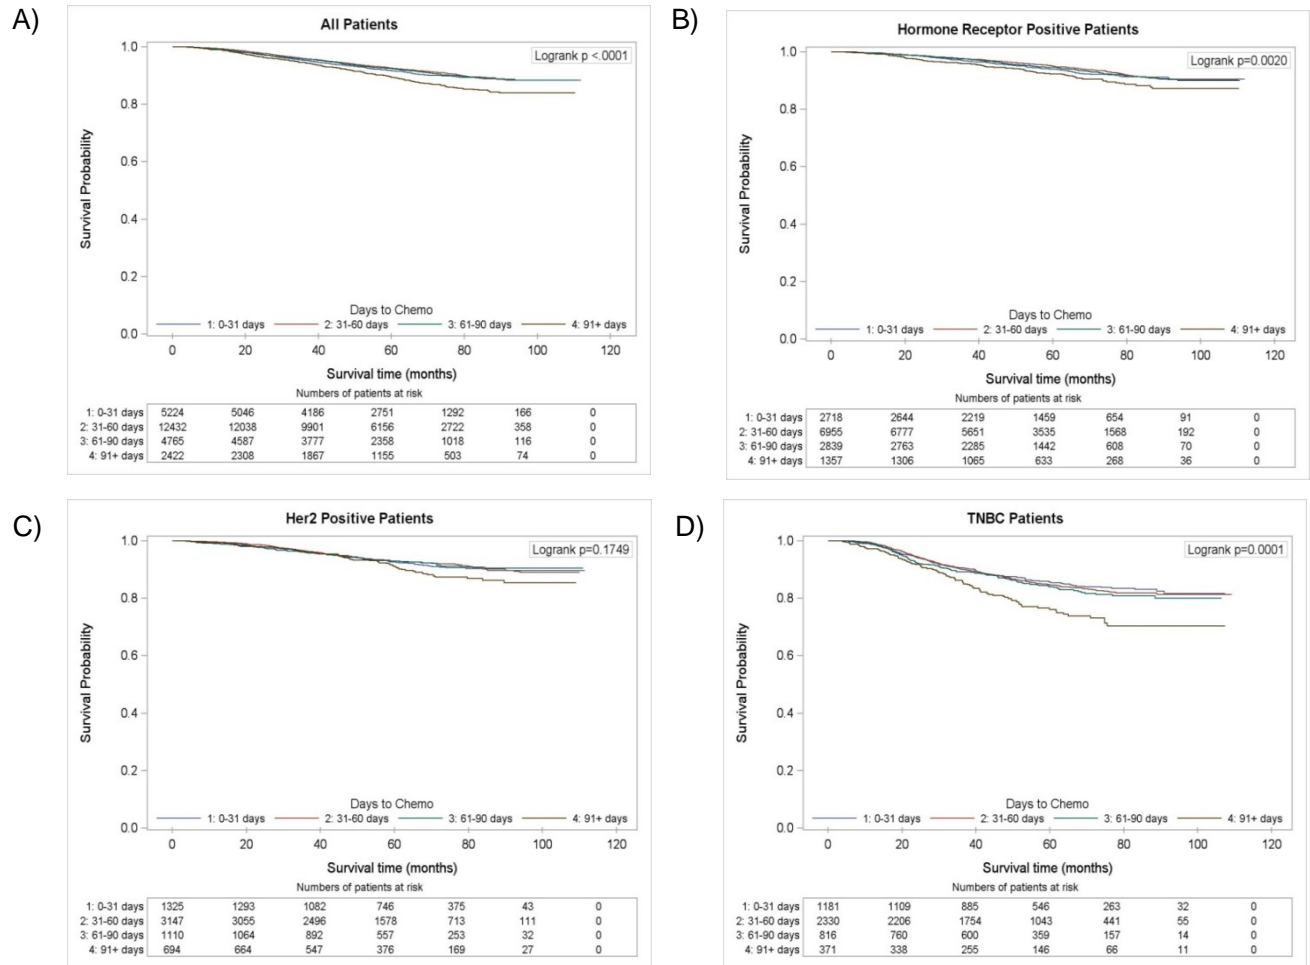

Supplement: NIHMS959642-supplement-1.pdf [file NIHMS959642-supplement-1.pdf]
